# Supplementary material for: Flower-mediated plant-butterfly interactions in an heterogeneous tropical coastal ecosystem
Source: PeerJ. 2018 Sep 7;6:e5493. doi: 10.7717/peerj.5493 (PMC6130237; doi:10.7717/peerj.5493)
Supplement: Data S1 — We provide all matrices and abbreviations of all species in the networks. [file peerj-06-5493-s003.xlsx]

## Sheet: General
	ASCMON	EUPHEG	HOROED	DRYIUL	AELTIT	PHOSEN	DANGIL	URBSIM	HELERA	PANPAN	ANTCLO	CALETH	URBPRO	CHIALB	Hesp044	Hesp091	AGRVAN	CYCTHR	HELCHA	THEJAL	HEMCEA	ASTFUL	URBDOR	LEPCAS	NISMAC	GLUDRU	ANAJAT	PROMER	JUNEVA	EURDAI	EPASPI	MARPET	POLASI	EUNMON	CALPER	ADEBAS	CHLTHE	DANPLE	URBDOY	BATPHI	MARCHI	PANHEC	STAMAZA	URBPRP	MELCHE	ANTCAR	EUEALI	HELARS	MYLPEL
BIDPIL	10	45	38	2	5	0	12	1	0	33	0	0	0	0	24	0	2	18	1	2	10	0	4	10	4	0	16	0	26	8	2	1	0	0	11	0	15	2	0	3	3	2	4	0	8	0	10	4	6
LANCAM	113	6	0	104	0	3	18	11	20	0	0	0	0	0	0	0	6	7	33	3	0	0	7	0	2	0	1	0	0	2	0	3	0	0	0	7	0	0	0	0	0	0	0	0	0	0	6	0	0
AGECOR	2	1	86	0	0	0	68	0	0	3	0	0	0	1	16	0	0	0	0	0	0	0	6	1	0	0	0	0	0	2	5	0	0	0	1	0	0	14	0	0	6	0	0	1	5	0	0	4	0
THAGEN	0	0	0	0	23	0	0	23	18	0	0	43	0	31	0	9	0	0	0	20	0	0	0	0	0	0	0	0	0	0	0	0	0	0	0	0	0	0	0	0	0	0	0	4	0	0	0	0	0
RUSSAR	28	45	0	0	0	40	0	0	0	0	0	0	0	0	0	0	6	0	0	0	0	0	0	0	0	0	0	0	0	0	0	0	0	0	0	0	0	0	0	13	0	0	0	0	0	0	0	0	0
CAEBON	0	0	1	0	15	0	0	6	0	10	0	0	0	0	0	0	0	0	0	0	0	0	4	0	8	0	0	32	0	0	18	0	12	0	0	0	0	0	0	0	0	6	0	3	0	0	0	0	7
TURDIF	18	71	0	0	0	0	0	0	0	0	0	0	0	0	0	0	0	2	0	0	0	0	0	0	0	0	0	0	0	5	0	0	5	0	0	0	0	0	0	0	0	0	3	0	0	0	0	0	0
WALIND	56	38	0	0	0	1	0	8	0	0	0	0	0	6	0	0	0	4	0	0	6	0	0	0	0	0	0	0	0	0	0	0	0	0	0	0	0	0	0	0	0	3	5	0	0	0	0	0	0
LYSDIV	0	2	0	0	23	8	4	0	0	0	0	0	0	0	0	0	5	0	0	0	0	0	0	0	0	0	0	0	0	0	0	7	2	25	0	0	0	0	0	4	0	0	0	0	0	0	0	0	0
CORSPI	0	0	4	0	0	0	0	0	0	0	0	0	9	0	0	0	0	0	0	0	0	0	0	0	0	0	0	0	0	0	0	16	0	0	0	12	0	0	0	0	8	0	0	0	0	15	0	0	0
RANACU	2	3	0	4	42	10	0	4	4	0	11	0	0	0	0	0	7	0	0	2	0	0	0	0	1	0	0	0	4	0	1	0	0	0	0	0	0	0	0	0	0	0	0	1	0	0	0	0	0
MACATR	0	0	0	0	0	28	0	28	0	0	0	0	0	7	0	0	0	0	0	0	2	0	0	9	0	0	0	0	0	7	1	0	3	0	0	0	0	0	0	0	0	0	0	0	0	0	0	0	0
PONSAG	0	0	0	0	0	0	0	0	0	0	0	0	33	0	0	7	0	0	0	5	0	11	0	0	0	0	2	0	0	0	0	0	0	0	0	0	0	0	0	0	0	0	0	0	0	0	0	0	1
SAGLAM	0	0	0	0	7	0	0	0	0	0	0	0	10	0	2	16	0	0	0	0	0	0	0	0	9	0	11	0	0	0	0	0	0	0	0	0	0	0	0	0	0	0	0	4	0	1	0	0	0
TURULM	2	0	0	1	0	20	0	0	0	0	9	0	0	0	0	5	2	0	0	0	0	0	0	0	3	0	0	0	0	0	0	0	0	0	0	0	0	0	0	0	0	0	0	0	0	0	0	0	0
PHYNOD	0	0	0	0	0	2	0	0	0	5	0	0	0	0	2	0	0	0	0	0	9	0	0	1	0	0	0	0	0	0	0	0	0	0	11	0	0	0	0	0	0	0	6	0	0	0	0	6	0
DALBRO	0	0	4	0	0	0	0	0	0	0	0	0	0	0	0	0	0	0	0	0	0	0	0	0	0	33	0	0	0	0	0	0	0	0	0	0	0	0	0	0	0	0	0	0	0	0	0	0	0
PETVOL	12	0	0	0	0	0	0	0	16	3	0	0	0	0	0	0	0	0	0	0	0	0	9	0	0	0	0	0	0	0	0	0	0	0	0	0	0	0	0	0	0	0	0	0	0	0	0	0	0
CHRICA	5	6	0	0	0	0	0	0	0	0	0	0	0	0	0	0	0	0	0	0	0	0	0	2	0	0	0	0	0	0	0	0	0	0	0	0	0	0	0	0	0	0	0	4	0	0	0	0	0
TECSTA	0	0	0	0	0	0	0	0	0	0	37	0	0	0	0	0	0	0	0	0	0	0	0	0	0	0	0	0	0	0	0	0	0	0	0	0	0	0	0	0	0	0	0	0	0	0	0	0	0
IPOPES	0	0	0	0	0	5	0	0	0	1	0	7	0	0	0	0	0	0	0	0	0	0	0	0	0	0	0	0	0	0	0	0	0	0	0	0	0	0	0	0	0	4	0	0	0	0	0	0	0
PALLIN	0	1	0	0	0	0	1	0	0	0	0	0	0	0	0	0	0	0	0	0	2	0	0	1	0	0	0	0	0	1	0	0	0	0	0	0	0	0	0	0	0	0	0	0	4	0	0	0	0
CALCAE	0	0	0	0	0	0	0	0	0	0	0	0	0	0	0	0	0	0	0	0	0	0	0	0	0	0	0	0	0	0	0	0	0	0	0	0	0	0	21	0	0	0	0	1	0	0	0	0	0
TOUHIR	0	0	0	26	0	0	0	0	0	0	0	0	0	0	0	0	0	0	0	0	0	0	0	0	0	0	0	0	0	0	0	0	0	0	0	0	0	0	0	0	0	0	0	0	0	0	0	0	0
FLOPED	1	13	0	0	0	0	3	0	0	0	0	0	0	0	0	0	2	0	1	0	0	0	0	1	0	0	0	0	0	0	0	0	0	0	0	0	1	0	0	0	0	0	0	0	0	0	0	0	0
ASCCUR	0	0	0	0	0	0	4	0	0	0	0	0	0	3	0	0	0	0	0	0	0	0	0	0	0	0	0	0	0	0	0	0	0	0	0	2	0	5	0	0	0	0	0	0	0	0	0	0	0
CNIHER	2	3	0	0	6	0	0	0	0	0	0	0	0	0	0	0	9	0	0	0	0	0	0	0	0	0	0	0	0	0	0	0	0	0	0	0	0	0	0	0	0	0	0	0	0	0	0	0	0
TABALB	0	0	0	0	0	0	0	0	0	0	0	0	0	0	0	0	0	0	0	0	0	11	4	0	0	0	0	0	0	0	0	0	0	0	0	0	0	0	0	0	0	0	0	0	0	0	0	0	0
JACMAC	0	0	19	0	0	0	0	0	0	0	0	0	0	0	0	0	0	0	0	0	0	0	0	0	0	0	0	0	0	0	0	0	0	0	0	0	0	0	0	0	0	0	0	0	0	0	0	0	0
TAMCUR	0	0	0	0	0	0	0	0	0	0	0	0	0	0	0	0	0	0	0	0	0	0	0	1	0	0	0	0	0	2	0	0	0	0	0	0	0	0	0	0	0	3	0	0	0	0	0	0	0
MIKMIC	0	0	0	17	0	0	0	0	0	0	0	0	0	0	0	0	0	0	0	0	0	0	0	0	0	0	0	0	0	0	0	0	0	0	0	0	0	0	0	0	0	0	0	0	0	0	0	0	0
IPOSTO	1	0	0	0	0	0	0	0	0	0	0	6	0	0	0	0	0	0	0	6	0	0	0	0	0	0	0	0	0	0	0	0	0	0	0	0	0	0	0	0	0	0	0	0	0	0	0	0	0
METSCH	1	0	0	0	5	0	1	0	0	0	0	0	0	0	0	0	0	0	0	0	0	0	0	0	0	0	0	0	0	0	0	0	0	0	0	0	1	0	0	0	1	0	0	0	0	0	0	0	0
PORPUN	0	0	0	0	0	0	0	0	0	3	0	0	0	0	0	0	0	0	0	0	0	0	0	0	0	0	0	0	0	0	0	0	2	0	0	0	0	0	0	0	0	0	0	0	0	0	0	0	0
CARPAP	0	0	0	0	0	0	0	0	0	0	0	0	0	0	0	0	0	0	0	0	0	12	0	0	0	0	0	0	0	0	0	0	0	0	0	0	0	0	0	0	0	0	0	0	0	0	0	0	0
MELAME	0	1	0	0	0	0	0	0	0	0	0	0	0	0	0	0	0	0	0	0	0	0	0	0	0	0	0	0	0	0	0	0	0	0	0	0	3	0	0	0	0	0	0	0	0	0	0	0	0
SAGLAH	0	0	0	0	0	0	0	0	0	0	0	0	0	0	1	1	0	0	0	0	0	0	0	0	0	0	2	0	0	0	0	0	0	0	0	0	0	0	0	0	0	0	0	0	0	0	0	0	0
NEULOB	0	0	0	2	0	0	0	0	3	0	0	0	0	0	0	0	0	0	0	0	0	0	0	0	0	0	0	0	0	0	0	0	0	0	0	0	0	0	0	0	0	0	0	0	0	0	0	2	0
COCLIE	0	0	0	0	0	0	0	0	0	0	0	0	0	0	0	0	0	0	0	0	0	0	0	0	6	0	0	0	0	0	0	0	0	0	0	0	0	0	0	0	0	0	0	0	0	0	0	0	0
CORPOL	0	0	0	0	0	0	0	0	0	0	0	0	0	0	0	0	0	5	0	0	0	0	0	0	0	0	0	0	0	0	0	0	0	0	0	0	0	0	0	0	0	0	0	0	0	0	0	0	0
CYACIN	0	0	0	0	0	0	0	0	0	0	0	0	0	0	0	0	0	0	0	0	0	0	0	1	0	0	0	0	0	0	0	0	0	0	0	0	0	0	0	0	0	0	0	0	0	0	0	0	0
ERIPRO	0	0	0	0	0	0	0	0	0	0	0	0	0	0	0	0	0	0	0	0	4	0	0	0	0	0	0	0	0	0	0	0	0	0	0	0	0	0	0	0	0	0	0	0	0	0	0	0	0
CROINC	0	0	0	0	0	0	0	0	0	0	0	0	0	0	0	0	0	0	0	0	0	0	0	0	0	0	0	0	0	0	0	0	0	0	0	0	0	0	0	0	0	0	0	0	0	0	0	0	0
PINPEN	0	0	4	0	0	0	0	0	0	0	0	0	0	0	0	0	0	0	0	0	0	0	0	0	0	0	0	0	0	0	0	0	0	0	0	0	0	0	0	0	0	0	0	0	0	0	0	0	0
BLEPYR	0	0	0	0	0	0	0	0	0	0	0	0	0	0	0	1	0	0	0	0	0	0	0	2	0	0	0	0	0	0	0	0	0	0	0	0	0	0	0	0	0	0	0	0	0	0	0	0	0
CALACU	0	0	0	0	0	0	0	0	0	0	0	0	0	0	0	0	0	3	0	0	0	0	0	0	0	0	0	0	0	0	0	0	0	0	0	0	0	0	0	0	0	0	0	0	0	0	0	0	0
CHACHA	0	0	0	0	0	3	0	0	0	0	0	0	0	0	0	0	0	0	0	0	0	0	0	0	0	0	0	0	0	0	0	0	0	0	0	0	0	0	0	0	0	0	0	0	0	0	0	0	0
CHICOR	0	0	3	0	0	0	0	0	0	0	0	0	0	0	0	0	0	0	0	0	0	0	0	0	0	0	0	0	0	0	0	0	0	0	0	0	0	0	0	0	0	0	0	0	0	0	0	0	0
MIMTRI	0	0	0	0	0	0	0	0	0	0	0	0	0	0	0	0	0	0	0	0	0	0	0	0	0	0	0	0	0	0	0	0	2	0	0	0	1	0	0	0	0	0	0	0	0	0	0	0	0
MUNCAL	0	0	0	0	0	0	0	0	0	0	0	0	0	0	0	3	0	0	0	0	0	0	0	0	0	0	0	0	0	0	0	0	0	0	0	0	0	0	0	0	0	0	0	0	0	0	0	0	0
OXAFRU	0	2	0	0	0	0	0	0	0	0	0	0	0	0	0	0	0	0	0	0	0	0	0	0	0	0	0	0	0	1	0	0	0	0	0	0	0	0	0	0	0	0	0	0	0	0	0	0	0
PSYERY	0	0	0	0	0	0	0	0	0	0	0	0	0	0	0	0	0	0	3	0	0	0	0	0	0	0	0	0	0	0	0	0	0	0	0	0	0	0	0	0	0	0	0	0	0	0	0	0	0
ANOCRI	0	0	0	0	0	0	0	0	0	0	0	0	0	0	0	0	0	0	0	0	0	0	0	2	0	0	0	0	0	0	0	0	0	0	0	0	0	0	0	0	0	0	0	0	0	0	0	0	0
COCHUM	0	0	0	0	0	0	0	0	0	0	0	0	0	0	0	0	0	0	0	0	0	0	0	2	0	0	0	0	0	0	0	0	0	0	0	0	0	0	0	0	0	0	0	0	0	0	0	0	0
COMERE	2	0	0	0	0	0	0	0	0	0	0	0	0	0	0	0	0	0	0	0	0	0	0	0	0	0	0	0	0	0	0	0	0	0	0	0	0	0	0	0	0	0	0	0	0	0	0	0	0
CONERE	0	0	1	0	0	0	0	0	0	0	0	0	0	0	0	0	0	0	0	0	0	0	0	0	0	0	0	0	0	0	0	0	0	0	0	0	0	0	0	0	0	0	0	0	0	0	0	0	0
IPOAQU	0	0	0	0	0	0	0	0	0	0	0	0	0	0	0	0	0	0	0	0	0	0	0	0	0	0	0	0	0	0	0	0	0	0	0	0	0	0	0	0	0	0	0	0	0	0	0	0	2
PECSAT	0	0	0	0	0	0	0	0	0	0	0	0	0	0	0	0	0	0	0	0	2	0	0	0	0	0	0	0	0	0	0	0	0	0	0	0	0	0	0	0	0	0	0	0	0	0	0	0	0
LUDOCT	0	1	0	0	0	1	0	0	0	0	0	0	0	0	0	0	0	0	0	0	0	0	0	0	0	0	0	0	0	0	0	0	0	0	0	0	0	0	0	0	0	0	0	0	0	0	0	0	0
DESADS	0	0	0	0	0	0	0	0	0	0	0	0	0	0	0	0	0	0	0	0	0	0	0	0	0	0	0	0	0	0	0	0	0	0	0	0	0	0	0	0	0	0	0	0	0	0	0	0	0
IREDIF	0	0	1	0	0	0	0	0	0	0	0	0	0	0	0	0	0	0	0	0	0	0	0	0	0	0	0	0	0	0	0	0	0	0	0	0	0	0	0	0	0	0	0	0	0	0	0	0	0
SIDACU	0	0	0	0	0	0	0	0	0	0	0	0	0	0	0	0	0	0	0	0	0	0	0	0	0	0	0	0	0	0	0	0	0	0	0	0	0	0	0	0	0	0	0	0	0	0	0	0	0
[truncated: 74 more columns]

## Sheet: CDS
	ASCMON	DRYIUL	EUPHEG	ANTCLO	AELTIT	HELCHA	AGRVAN	DANGIL	HELERA	URBSIM	PHOSEN	EUEALI	CYCTHR	URBDOR	Hesp158	ANTMAE	NISMAC	HEMCEA	CHIALB	PAPTHO	URBESM	CHLTHE	MIMPHA	MYLPEL	STAMAZA	THEJAL	HOROED	JUNEVA	NATIOL	PYRPRO	EUREPI	HELMAC	LEPCAS	MARPET	MICHEC	PANHEC	SIPSTE	EURDAI	HEMCEW	Hesp162	MELCHE	POLASI	REKPAL	CALISO	DIOJUN	DOXPAV	EPASPI	Hesp043	LIBCAR
LANCAM	78	100	1	0	0	30	6	18	20	11	2	6	0	7	3	2	2	0	0	6	2	0	5	0	0	3	0	0	0	0	0	0	0	3	3	0	0	2	0	0	0	0	2	0	1	0	0	0	0
WALIND	56	0	37	0	0	0	0	0	0	8	1	0	4	0	6	0	0	6	6	0	0	0	0	0	5	0	0	0	0	0	0	0	0	0	0	3	0	0	0	0	0	0	0	0	0	0	0	0	0
RANACU	2	4	3	11	42	0	7	0	4	4	9	0	0	0	0	2	1	0	0	0	0	0	0	0	0	2	0	4	4	0	3	0	0	0	0	0	0	0	0	0	0	0	0	0	0	0	1	0	0
BIDPIL	0	0	14	0	0	1	0	4	0	0	0	10	0	4	0	0	2	1	0	0	0	4	0	5	0	0	0	0	0	0	0	0	0	0	0	0	0	0	0	0	2	0	0	0	0	0	0	0	0
TECSTA	0	0	0	37	0	0	0	0	0	0	0	0	0	0	0	0	0	0	0	0	0	0	0	0	0	0	0	0	0	0	0	0	0	0	0	0	0	0	0	0	0	0	0	0	0	0	0	0	0
TURDIF	18	0	5	0	0	0	0	0	0	0	0	0	0	0	0	2	0	0	0	0	0	0	0	0	0	0	0	0	0	4	0	0	0	0	0	0	0	0	0	0	0	0	0	1	0	0	0	0	0
TOUHIR	0	26	0	0	0	0	0	0	0	0	0	0	0	0	0	0	0	0	0	0	0	0	0	0	0	0	0	0	0	0	0	0	0	0	0	0	3	0	0	0	0	0	0	0	0	0	0	0	0
FLOPED	0	0	13	0	0	1	2	3	0	0	0	0	0	0	0	0	0	0	0	0	0	0	0	0	0	0	0	0	0	0	0	3	1	0	0	0	0	0	2	0	0	0	0	0	0	0	0	0	0
TURULM	1	1	0	9	0	0	2	0	0	0	6	0	0	0	0	2	3	0	0	0	0	0	0	0	0	0	0	0	0	0	0	0	0	0	0	0	0	0	0	0	0	0	0	0	0	1	0	0	0
CNIHER	2	0	2	0	6	0	9	0	0	0	0	0	0	0	0	0	0	0	0	0	0	0	0	0	0	0	0	0	0	0	0	0	0	0	0	0	0	0	0	2	0	0	0	0	0	0	0	0	0
CORPOL	0	0	0	0	0	0	0	0	0	0	0	0	5	0	0	0	0	0	0	0	0	0	0	0	0	0	0	0	0	0	0	0	0	0	0	0	0	0	0	0	0	0	0	0	0	0	0	0	1
CHRICA	0	0	0	0	0	0	0	0	0	0	0	0	0	0	0	0	0	0	0	0	4	0	0	0	0	0	0	0	0	0	0	0	0	0	0	0	0	0	0	0	0	0	0	0	0	0	0	0	0
CALACU	0	0	0	0	0	0	0	0	0	0	0	0	3	0	0	0	0	0	0	0	0	0	0	0	0	0	0	0	0	0	0	0	0	0	0	0	0	0	0	0	0	0	0	0	0	0	0	0	0
CHICOR	0	0	0	0	0	0	0	0	0	0	0	0	0	0	0	0	0	0	0	0	0	0	0	0	0	0	3	0	0	0	0	0	0	0	0	0	0	0	0	0	0	0	0	0	0	0	0	0	0
MIMTRI	0	0	0	0	0	0	0	0	0	0	0	0	0	0	0	0	0	0	0	0	0	1	0	0	0	0	0	0	0	0	0	0	0	0	0	0	0	0	0	0	0	2	0	0	0	0	0	0	0
COMERE	2	0	0	0	0	0	0	0	0	0	0	0	0	0	0	0	0	0	0	0	0	0	0	0	0	0	0	0	0	0	0	0	0	0	0	0	0	0	0	0	0	0	0	0	0	0	0	0	0
MACATR	0	0	0	0	0	0	0	0	0	0	0	0	0	0	0	0	0	0	0	0	0	0	0	0	0	0	0	0	0	0	0	0	2	0	0	0	0	0	0	0	0	0	0	0	0	0	0	0	0
IREDIF	0	0	0	0	0	0	0	0	0	0	0	0	0	0	0	0	0	0	0	0	0	0	0	0	0	0	1	0	0	0	0	0	0	0	0	0	0	0	0	0	0	0	0	0	0	0	0	0	0
SIDACU	0	0	0	0	0	0	0	0	0	0	0	0	0	0	0	0	0	0	0	0	0	0	0	0	0	0	0	0	0	0	0	0	0	0	0	0	0	0	0	0	0	0	0	0	0	0	0	1	0
[truncated: 3 more columns]

## Sheet: PDV
	HOROED	DANGIL	PHOSEN	PANPAN	ASCMON	Hesp044	EUPHEG	URBSIM	GLUDRU	PROMER	HEMCEA	EPASPI	JUNEVA	AELTIT	CALPER	LEPCAS	ANAJAT	POLASI	EURDAI	DANPLE	CYCTHR	MELCHE	CALETH	PHOBEL	PANHEC	POLI12	MARCHI	URBDOR	STAMAZA	NISMAC	PYRCOM	MYLPEL	HELARS	ANTERO	CHIALB	THEJAL	ADEBAS	CARINO	NATIOL	Hesp028	UTEORN	Hesp167	Hesp087	Hesp163	POLVIB	MACROC	URBPRP	STRSER	PANBAT
BIDPIL	38	8	0	33	10	24	29	1	0	0	9	2	26	5	11	10	16	0	7	2	16	6	0	0	2	3	3	0	4	2	9	1	4	4	0	2	0	1	4	0	0	0	0	0	5	0	0	0	0
AGECOR	86	68	0	3	2	16	1	0	0	0	0	5	0	0	1	1	0	0	2	14	0	5	0	0	0	0	6	6	0	0	0	0	4	0	1	0	0	0	2	0	0	0	0	0	0	0	1	4	0
CAEBON	1	0	0	10	0	0	0	6	0	32	0	18	0	15	0	0	0	12	0	0	0	0	0	1	6	0	0	4	0	8	0	7	0	4	0	0	0	6	0	6	0	0	0	0	0	0	3	0	0
MACATR	0	0	28	0	0	0	0	28	0	0	2	1	0	0	0	7	0	3	7	0	0	0	0	0	0	0	0	0	0	0	0	0	0	0	7	0	0	0	0	0	0	0	0	0	0	0	0	0	3
LANCAM	0	0	1	0	35	0	4	0	0	0	0	0	0	0	0	0	1	0	0	0	0	0	0	0	0	0	0	0	0	0	0	0	0	0	0	0	7	0	0	0	0	0	0	0	0	0	0	0	0
DALBRO	4	0	0	0	0	0	0	0	33	0	0	0	0	0	0	0	0	0	0	0	0	0	0	0	0	0	0	0	0	0	0	0	0	0	0	0	0	0	0	0	0	0	0	0	0	0	0	0	0
PHYNOD	0	0	2	5	0	2	0	0	0	0	9	0	0	0	11	1	0	0	0	0	0	0	0	0	0	0	0	0	6	0	0	0	0	0	0	0	0	0	0	0	0	0	0	0	0	0	0	0	0
IPOPES	0	0	5	1	0	0	0	0	0	0	0	0	0	0	0	0	0	0	0	0	0	0	7	0	4	1	0	0	0	0	0	0	0	0	0	0	0	0	0	0	0	6	0	5	0	0	0	0	0
PALLIN	0	1	0	0	0	0	1	0	0	0	2	0	0	0	0	1	0	0	1	0	0	4	0	12	0	5	0	0	0	0	0	0	0	0	0	0	0	0	0	0	0	0	0	0	0	0	0	0	0
TURULM	0	0	14	0	1	0	0	0	0	0	0	0	0	0	0	0	0	0	0	0	0	0	0	0	0	0	0	0	0	0	0	0	0	0	0	0	0	0	0	0	0	0	0	0	0	0	0	0	0
METSCH	0	1	0	0	1	0	0	0	0	0	0	0	0	5	0	0	0	0	0	0	0	0	0	0	0	0	1	0	0	0	0	0	0	0	0	0	0	0	0	0	0	0	0	0	0	4	0	0	0
PORPUN	0	0	0	3	0	0	0	0	0	0	0	0	0	0	0	0	0	2	0	0	0	0	0	0	0	0	0	0	0	0	0	0	0	0	0	0	0	0	0	0	1	0	5	0	0	0	0	0	0
IPOSTO	0	0	0	0	1	0	0	0	0	0	0	0	0	0	0	0	0	0	0	0	0	0	6	0	0	0	0	0	0	0	0	0	0	0	0	6	0	0	0	0	0	0	0	0	0	0	0	0	0
ERIPRO	0	0	0	0	0	0	0	0	0	0	4	0	0	0	0	0	0	0	0	0	0	0	0	0	0	2	0	0	0	0	0	0	0	0	0	0	0	0	0	0	0	0	0	0	0	0	0	0	0
CROINC	0	0	0	0	0	0	0	0	0	0	0	0	0	0	0	0	0	0	0	0	0	0	0	0	0	0	0	0	0	0	0	0	0	0	0	0	0	0	0	0	5	0	0	0	0	0	0	0	0
CHACHA	0	0	3	0	0	0	0	0	0	0	0	0	0	0	0	0	0	0	0	0	0	0	0	0	0	0	0	0	0	0	0	0	0	0	0	0	0	0	0	0	0	0	0	0	0	0	0	0	0
LUDOCT	0	0	1	0	0	0	1	0	0	0	0	0	0	0	0	0	0	0	0	0	0	0	0	0	0	0	0	0	0	0	0	0	0	0	0	0	0	0	0	0	0	0	0	0	0	0	0	0	0
RANACU	0	0	1	0	0	0	0	0	0	0	0	0	0	0	0	0	0	0	0	0	0	0	0	0	0	0	0	0	0	0	0	0	0	0	0	0	0	0	0	0	0	0	0	0	0	0	0	0	0
CONERE	1	0	0	0	0	0	0	0	0	0	0	0	0	0	0	0	0	0	0	0	0	0	0	0	0	0	0	0	0	0	0	0	0	0	0	0	0	0	0	0	0	0	0	0	0	0	0	0	1
PECSAT	0	0	0	0	0	0	0	0	0	0	2	0	0	0	0	0	0	0	0	0	0	0	0	0	0	0	0	0	0	0	0	0	0	0	0	0	0	0	0	0	0	0	0	0	0	0	0	0	0
CORSPI	0	0	0	0	0	0	0	0	0	0	0	0	0	0	0	0	0	0	0	0	0	0	0	0	0	0	1	0	0	0	0	0	0	0	0	0	0	0	0	0	0	0	0	0	0	0	0	0	0
[truncated: 26 more columns]

## Sheet: TDF
	EUPHEG	PHOSEN	ASCMON	EUNMON	AELTIT	BATPHI	CHLTHE	PHOAGA	PHOARG	EURPHI	AGRVAN	CYCTHR	ABANIC	EURDAI	MICHEC	MARPET	MININO	POLASI	Hesp164	PAPANC	PAPTHO	LEPCAS	PYRPRO	STRSER	DANGIL	DRYIUL	Hesp166	HOROED	POLI12	URBPRP	ANTMAE	EUREPI	HELCHA	HELSUB	MIMPHA	PANHEC	PYRNIS	QUAEUL	STAMAZA	HEMCEW	Hesp158	Hesp159	PANBAT	STRBAZ	STRIST
RUSSAR	45	40	28	0	0	13	0	0	12	0	6	0	5	0	0	0	0	0	0	0	0	0	0	0	0	0	0	0	0	0	3	0	0	0	0	0	2	0	0	0	0	0	0	0	0
LYSDIV	2	8	0	25	23	4	0	14	0	12	5	0	0	0	0	7	0	2	0	6	6	0	0	0	4	0	0	0	0	0	0	3	0	0	3	0	0	3	0	0	0	0	0	0	0
TURDIF	66	0	0	0	0	0	0	0	2	0	0	2	4	5	0	0	7	5	6	0	0	0	0	0	0	0	0	0	0	0	0	0	0	0	0	0	1	0	3	1	2	0	0	0	0
CHRICA	6	0	5	0	0	0	0	0	0	0	0	0	0	0	9	0	0	0	0	0	0	2	0	5	0	0	0	0	0	4	0	0	0	0	0	0	0	0	0	1	0	0	0	0	1
TAMCUR	0	0	0	0	0	0	0	0	0	0	0	0	1	2	0	0	0	0	0	0	0	1	5	0	0	0	4	0	0	0	0	0	0	3	0	3	0	0	0	0	0	0	0	0	0
LANCAM	1	0	0	0	0	0	0	0	0	0	0	7	0	0	0	0	0	0	0	0	0	0	0	0	0	4	0	0	0	0	0	0	3	0	0	0	0	0	0	0	0	2	0	0	0
BIDPIL	2	0	0	0	0	0	11	0	0	0	0	2	0	1	0	0	0	0	0	0	0	0	0	0	0	0	0	0	0	0	0	0	0	0	0	0	0	0	0	0	0	0	0	0	0
MELAME	1	0	0	0	0	0	3	0	0	0	0	0	0	0	0	0	0	0	0	0	0	0	0	0	0	0	0	0	4	0	0	0	0	0	0	0	0	0	0	0	0	0	0	0	0
PINPEN	0	0	0	0	0	0	0	0	0	0	0	0	0	0	0	0	0	0	0	0	0	0	0	0	0	0	0	4	0	0	0	0	0	0	0	0	0	0	0	0	0	0	1	0	0
FLOPED	0	0	1	0	0	0	1	0	0	0	0	0	0	0	0	0	0	0	0	0	0	0	0	0	0	0	0	0	0	0	0	0	0	0	0	0	0	0	0	0	0	0	0	1	0
OXAFRU	2	0	0	0	0	0	0	0	0	0	0	0	0	1	0	0	0	0	0	0	0	0	0	0	0	0	0	0	0	0	0	0	0	0	0	0	0	0	0	0	0	0	0	0	0
COCHUM	0	0	0	0	0	0	0	0	0	0	0	0	0	0	0	0	0	0	0	0	0	2	0	0	0	0	0	0	0	0	0	0	0	0	0	0	0	0	0	0	0	0	0	0	0
CNIHER	1	0	0	0	0	0	0	0	0	0	0	0	0	0	0	0	0	0	0	0	0	0	0	0	0	0	0	0	0	0	0	0	0	0	0	0	0	0	0	0	0	0	0	0	0
WALIND	1	0	0	0	0	0	0	0	0	0	0	0	0	0	0	0	0	0	0	0	0	0	0	0	0	0	0	0	0	0	0	0	0	0	0	0	0	0	0	0	0	0	0	0	0

## Sheet: TDFW
	URBPRO	CALETH	Hesp091	ASTFUL	CHIALB	AELTIT	THEJAL	URBSIM	HELERA	URBDOY	DRYIUL	ANTCAR	MARPET	ANAJAT	ADEBAS	ANAFAT	Hesp032	MECPOL	SIPSTE	Hesp048	NISMAC	RETARC	URBPRP	EMETEN	HELARS	EURALB	HAMGUA	Hesp043	MARCHI	ARCDEM	PANBIT	URBESM	DANPLE	Hesp167	LEPCAS	ANTTUL	DANGIL	HOROED	THEEUP	URBDOR	CALLIL	Hesp044	MYLPEL	CALISO	Hesp168	ARASIT	HYLPHY	LYCHAL	MYSETH
THAGEN	0	43	9	0	31	23	20	23	18	0	0	0	0	0	0	0	9	0	0	10	0	0	4	0	0	0	0	0	0	0	0	0	0	0	0	0	0	0	0	0	0	0	0	0	0	0	1	0	0
CORSPI	9	0	0	0	0	0	0	0	0	0	0	15	16	0	12	0	0	11	11	0	0	9	0	6	0	0	0	0	7	0	6	0	0	0	0	0	0	4	2	0	0	0	0	2	0	0	0	0	0
PONSAG	33	0	7	11	0	0	5	0	0	0	0	0	0	2	0	0	0	0	0	0	0	0	0	0	0	2	7	5	0	0	0	0	0	5	0	0	0	0	0	0	0	0	1	0	0	0	0	0	0
SAGLAM	10	0	16	0	0	7	0	0	0	0	0	1	0	11	0	0	0	0	0	0	9	0	4	0	0	0	0	2	0	0	0	0	0	0	0	0	0	0	0	0	3	2	0	0	2	1	0	0	1
CALCAE	0	0	0	0	0	0	0	0	0	21	0	0	0	0	0	0	0	0	0	0	0	0	1	1	0	0	0	0	0	0	0	6	0	0	0	0	0	0	0	0	0	0	0	0	0	0	0	0	0
ASCCUR	0	0	0	0	3	0	0	0	0	0	0	0	0	0	2	9	0	0	0	0	0	0	0	1	0	0	0	0	0	0	0	0	5	0	0	0	4	0	0	0	0	0	0	0	0	0	0	0	0
TABALB	0	0	0	11	0	0	0	0	0	0	0	0	0	0	0	0	0	0	0	0	0	0	0	0	0	0	0	0	0	6	0	0	0	0	0	0	0	0	0	4	0	0	0	0	0	0	0	0	0
MIKMIC	0	0	0	0	0	0	0	0	0	0	17	0	0	0	0	0	0	0	0	0	0	0	0	0	0	0	0	0	0	0	0	0	0	0	0	0	0	0	0	0	0	0	0	0	0	0	0	1	0
CARPAP	0	0	0	12	0	0	0	0	0	0	0	0	0	0	0	0	0	0	0	0	0	0	0	0	0	0	0	0	0	0	0	0	0	0	0	0	0	0	0	0	0	0	0	0	0	0	0	0	0
PHYNOD	0	0	0	0	0	0	0	0	0	0	0	0	0	0	0	0	2	0	0	0	0	0	0	0	6	0	0	0	0	0	0	0	0	0	0	0	0	0	0	0	0	0	0	0	0	0	0	0	0
SAGLAH	0	0	1	0	0	0	0	0	0	0	0	0	0	2	0	2	0	0	0	0	0	0	0	0	0	0	0	0	0	0	0	0	0	0	0	0	0	0	2	0	0	1	0	0	0	0	0	0	0
NEULOB	0	0	0	0	0	0	0	0	3	0	2	0	0	0	0	0	0	0	0	0	0	0	0	0	2	0	0	0	0	0	0	0	0	0	0	0	0	0	0	0	0	0	0	0	0	0	0	0	0
CYACIN	0	0	0	0	0	0	0	0	0	0	0	0	0	0	0	0	0	0	0	0	0	0	0	0	0	5	0	0	0	0	0	0	0	0	1	0	0	0	0	0	0	0	0	0	0	0	0	0	0
TURULM	0	0	5	0	0	0	0	0	0	0	0	0	0	0	0	0	0	0	0	0	0	0	0	0	0	0	0	0	0	0	0	0	0	0	0	0	0	0	0	0	0	0	0	0	0	0	0	0	0
BIDPIL	0	0	0	0	0	0	0	0	0	0	0	0	0	0	0	0	0	0	0	0	0	0	0	0	0	0	0	0	0	0	0	0	0	0	0	3	0	0	0	0	0	0	0	0	0	0	0	0	0
BLEPYR	0	0	1	0	0	0	0	0	0	0	0	0	0	0	0	0	0	0	0	0	0	0	0	0	0	0	0	0	0	0	0	0	0	0	2	0	0	0	0	0	0	0	0	0	0	0	0	0	0
MUNCAL	0	0	3	0	0	0	0	0	0	0	0	0	0	0	0	0	0	0	0	0	0	0	0	0	0	0	0	0	0	0	0	0	0	0	0	0	0	0	0	0	0	0	0	0	0	0	0	0	0
ANOCRI	0	0	0	0	0	0	0	0	0	0	0	0	0	0	0	0	0	0	0	0	0	0	0	0	0	0	0	0	0	0	0	0	0	0	2	0	0	0	0	0	0	0	0	0	0	0	0	0	0
IPOAQU	0	0	0	0	0	0	0	0	0	0	0	0	0	0	0	0	0	0	0	0	0	0	0	0	0	0	0	0	0	0	0	0	0	0	0	0	0	0	0	0	0	0	2	0	0	0	0	0	0
DESADS	0	0	0	0	0	0	0	0	0	0	0	0	0	0	0	0	0	0	0	0	0	0	0	0	0	0	0	0	0	0	0	0	0	0	0	1	0	0	0	0	0	0	0	0	0	0	0	0	0
[truncated: 2 more columns]

## Sheet: TSF
	HOROED	HELERA	ASCMON	URBDOR	NISMAC	HELCHA	PANPAN	CONFAB
PETVOL	0	16	12	9	0	0	3	0
JACMAC	19	0	0	0	0	0	0	1
COCLIE	0	0	0	0	6	0	0	0
PSYERY	0	0	0	0	0	3	0	0

## Sheet: Abbreviations
Butterfly species	Abbreviation (butterflies)	Feeding plants	Abbreviation (feeding plants)
Abaeis nicippe (Cramer, 1779)	ABANIC	Ageratum corymbosum Zuccagni ex Pers.	AGECOR
Adelpha basiloides (H. Bates, 1865)	ADEBAS	Anoda cristata (L.) Schltdl.	ANOCRI
Aellopos titan (Cramer, 1777)	AELTIT	Asclepias curassavica L.	ASCCUR
Agraulis vanillae incarnata (N. Riley, 1926)	AGRVAN	Bidens pilosa L.	BIDPIL
Anartia fatima fatima (Fabricius, 1793)	ANAFAT	Blechum pyramidatum (Lam.) Urb.	BLEPYR
Anartia jatrophae luteipicta Frustorfer, 1907	ANAJAT	Caesalpinia bonduc (L.) Roxb.	CAEBON
Anteos clorinde (Godart, [1824])	ANTCLO	Callicarpa acuminata Kunth	CALACU
Anteos maerula (Fabricius, 1775)	ANTMAE	Calopogonium caeruleum (Benth.) C. Wright	CALCAE
Anteros carasius carasius Westwood, 1851	ANTCAR	Carica papaya L.	CARPAP
Anthanassa tulcis (H.W Bates, 1864)	ANTTUL	Chamaecrista chamaecristoides (Collad.) Greene	CHACHA
Antigonus erosus (Hübner, [1812])	ANTERO	Chiococca coriacea M. Martens & Galeotti	CHICOR
Antigonus nearchus (Latreille, 1817)	Hesp028	Chrysobalanus icaco L.	CHRICA
Arawacus sito (Boisduval, 1836)	ARASIT	Cnidoscolus herbaceus (L.) I.M. Johnst.	CNIHER
Archaeoprepona demophon centralis (Fruhstorfer, 1905)	ARCDEM	Coccoloba humboldtii Meisn.	COCHUM
Ascia monuste monuste (Linnaeus, 1764)	ASCMON	Coccoloba liebmannii Lindau	COCLIE
Astraptes fulgetaror azul (Reakirt, [1867])	ASTFUL	Commelina erecta L.	COMERE
Battus philenor philenor (Linnaeus, 1771)	BATPHI	Conocarpus erectus L.	CONERE
Calephelis perditalis donahuei McAlpine, 1971	CALPER	Cordia spinescens L.	CORSPI
Calicosama lilina (Butler, 1870)	CALLIL	Cordia polycephala (Lam.) I.M.Johnst.	CORPOL
Calpodes ethlius (Stoll, 1782)	CALETH	Crotalaria incana L.	CROINC
Calycopis isobeon (Butler & H. Druce, 1872)	CALISO	Cyanthillium cinereum (L.) H.Rob.	CYACIN
Caria ino melicerta Schaus, 1890	CARINO	Dalbergia brownei (Jacq.) Schinz	DALBRO
Chioides albofasciatus (Hewitson, 1867)	CHIALB	Desmodium adscendens (Sw.) DC.	DESADS
Chlosyne theona theona (Ménétriés, 1855)	CHLTHE	Erigeron procumbens (Houst. ex Mill.) G.L.Nesom	ERYPRO
Cogia calchas (Herrich-Shäffer, 1869)	Hesp158	Florestina pedata (Cav.) Cass.	FLOPED
Consul fabius cecrops (Doubleday, [1849])	CONFAB	Ipomoea aquatica Forssk.	IPOAQU
Corticea lysias lysias (Plötz, 1883)	Hesp167	Ipomoea pes-caprae (L.) Sweet	IPOPES
Cycloglypha thrasibulus thrasibulus (Fabricius, 1793)	CYCTHR	Ipomoea stolonifera (Cirillo) J.F. Gmel.	IPOSTO
Cyclosemia anastomosis Mabille, 1878	Hesp032	Iresine diffusa Humb. & Bonpl. ex Willd.	IREDIF
Danaus gilippus thersippus (H.W. Bates, 1863)	DANGIL	Jacquinia macrocarpa Cav.	JACMAC
Danaus plexippus plexippus (Linnaesus, 1785)	DANPLE	Lantana camara L.	LANCAM
Dione juno huascuma (Reakirt, 1866)	DIOJUN	Ludwigia octovalvis (Jacq.) P.H. Raven	LUDLEP
Doxocopa pavon theodora (Lucas, 1857)	DOXPAV	Lysiloma divaricatum (Jacq.) J.F. Macbr.	LYSDIV
Dryas iulia moderata (Riley, 1926)	DRYIUL	Macroptilium atropurpureum (Moc. & Sessé ex DC.) Urb.	MACATR
Emesis tenedia C. Felder & R. Felder, 1861	EMETEN	Melampodium americanum L.	MELAME
Epargyreus spina spina Evans, 1952	EPASPI	Metastelma schlechtendalii (Decne.) Standl. & Steyerm.	METSCH
Eueides aliphera gracilis (Stichel, 1903)	EUEALI	Mikania micrantha Kunth	MIKMIC
Eunica monima (Stoll, 1782)	EUNMON	Mimosa tricephala Schltdl. & Cham.	MIMTRI
Euptoieta hegesia meridiania Stichel, 1938	EUPHEG	Muntingia calabura L.	MUNCAL
Eurema albula celata (R. Felder, 1869)	EURALB	Neurolaena lobata (L.) R.Br. ex Cass.	NEULOB
Eurema daira eugenia (Wallengren, 1860)	EURDAI	Oxalis frutescens L.	OXAFRU
Eurytides epidaus epidaus (Doubleday, 1846)	EUREPI	Palafoxia lindenii A.Gray	PALLIN
Eurytides philoaus philoaus (Boisduval, 1836)	EURPHI	Pectis saturejoides (Mill.) Sch. Bip.	PECSAT
Ganyra phaloe tiburtia (Fruhstorfer, 1907)	GANPHA	Petrea volubilis L.	PETVOL
Glutophrissa drusilla tenuis (Lamas, 1981)	GLUDRU	Phyla nodiflora (L.) Greene	PHYNOD
Hamadryas guatemalena marmarice (Fruhstorfer, 1916)	HAMGUA	Pinochia peninsularis (Woodson) M.E.Endress & B.F.Hansen	PINPEN
Heliconius charitonia vazquezae W. Comstock & F. Brown, 1950	HELCHA	Pontederia sagittata C. Presl	PONSAG
Heliconius erato petiverana Doubleday, 1847	HELERA	Porophyllum punctatum (Mill.) S.F.Blake	PORPUN
Heliopetes arsalte (Linnaeus, 1758)	HELARS	Psychotria erythrocarpa Schltdl.	PSYERY
Heliopetes macaira macaira (Reakirt, [1867])	HELMAC	Randia aculeata var. dasyclada Steyerm.	RANACU
Heliopyrgus sublinea (Schaus, 1902)	HELSUB	Russelia sarmentosa Jacq.	RUSSAR
Hemiargus ceraunus astenidas (Lucas, 1857)	HEMCEA	Sagittaria lancifolia (Female)	SAGLAH
Hemiargus ceraunus watsoni W. Comstock & Huntington, 1943	HEMCEW	Sagittaria lancifolia (Male)	SAGLAM
Hesp043	Hesp043	Sida acuta Burm. f.	SIDACU
Hesp044	Hesp044	Tabernaemontana alba Mill.	TABALB
Hesp048	Hesp048	Tamonea curassavica (L.) Pers.	TAMCUR
Hesp052	Hesp052	Tecoma stans (L.) Juss. ex Kunth	TECSTA
Hesp085	Hesp085	Thalia geniculata L.	THAGEN
Hesp087	Hesp087	Tournefortia hirsutissima L.	TOUHIR
Hesp159	Hesp159	Turnera diffusa Willd.	TURDIF
Hesp161	Hesp161	Turnera ulmifolia L.	TURULM
Hesp162	Hesp162	Vitis tiliifolia Humb. & Bonpl. ex Schult.	VITTIL
Hesp163	Hesp163	Waltheria indica L.	WALIND
Hesp168	Hesp168
Horama oedippus (Boisduval, 1870)	HOROED
Horama plumipes (Drury, 1773)	HORPLU
Horama sp.	HORSP
Hylephila phyleus phyleus (Drury, 1773)	HYLPHY
Junonia evarete (Cramer, 1779) (E Mexican segregate)	JUNEVA
Leptotes cassius cassidula (Boisduval, 1970)	LEPCAS
Lerodea eufala eufala (W. H. Edwards, 1869)	Hesp166
Libytheana carinenta mexicana Michener, 1943	LIBCAR
Lycorea halia atergatis Doubleday, [1847]	LYCHAL
Macrocneme sp.	MACROC
Marpesia chiron (Fabricius, 1775)	MARCHI
Marpesia petreus (Cramer, 1176) (Northern segregate)	MARPET
Mechanitis polymia lycidice H. Bates, 1864	MECPOL
Melanchroia chephise (Stoll, 1782)	MELCHE
Michaelus hecate (Godman & Salvin, 1887)	MICHEC
Mimoides phaon phaon (Boisduval, 1836)	MIMPHA
Ministrymon inoa (Godman & Salvin, 1887)	MININO
Mylon pelopidas (Fabricius, 1793)	MYLPEL
Myscelia ethusa ethusa (Doyère, [1840])	MYSETH
Nathalis iole iole Boisduval, 1836	NATIOL
Nisoniades macarius (Herrich-Schäffer, 1870)	NISMAC
Panoquina hecebolus (Scudder, 1872)	PANHEC
Panoquina panoquinoides panoquinoides (Skinner, 1891)	PANPAN
Panthiades bathildis (C. Felder & R. Felder, 1865)	PANBAT
Panthiades bitias (Cramer, 1777)	PANBIT
Papilio anchisiades idaeus Fabricius, 1793	PAPANC
Papilio thoas autocles Rostchild y Jordan, 1906	PAPTHO
Phocides belus Godman & Salvin, 1890	PHOBEL
Phoebis agarithe agarithe (Boisduval, 1836)	PHOAGA
Phoebis argante ssp. n. DHJ01 (P. argante of Brown, 1929)	PHOARG
Phoebis sennae marcellina (Cramer, 1777)	PHOSEN
Polilla12	POLI12
Polites vibex vibex (Geyer, 1832)	POLVIB
Polythrix asine (Hewitson, 1867)	POLASI
Proteides mercurius mercurius (Fabricius, 1787)	PROMER
Pyrausta tyralis Guenée, 1854	PYRTYR
Pyrgus communis communis (Grote, 1872)	PYRCOM
Pyrisitia nise nelphe (Cramer, 1775)	PYRNIS
Pyrisitia proterpia (Fabricius,1775)	PYRPRO
Quasimellana eulogius (Plötz, 1882)	QUAEUL
Rekoa palegon (Cramer, 1780)	REKPAL
Rhetus arcius thia (Morisse, 1838)	RETARC
Siproeta stelenes (Linnaeus, 1758)	SIPSTE
Staphylus azteca (Scudder, 1872)	STAAZT
Staphylus mazans (Reakirt, [1867])	STAMAZA
Strymon bazochii bazochii (Godart, [1824])	STRBAZ
Strymon istapa istapa (Reakirt, [1867])	STRIST
Strymon serapio (Goldman & Salvin, 1887)	STRSER
Taygetis thamyra (Cramer, 1779	TAYTHA
Theope eupolis Schaus, 1890	THEEUP
Thessia jalapus (Plötz, 1881)	THEJAL
Urbanus dorantes dorantes (Stoll, 1790)	URBDOR
Urbanus doryssus (Swainson, 1831) (E Mexican segregate)	URBDOY
Urbanus esmeraldus (Butler, 1877)	URBESM
Urbanus procne (Plötz, 1881)	URBPRO
Urbanus proteus proteus (Linnaeus, 1758)	URBPRP
Urbanus simplicius (Stoll, 1790)	URBSIM
Utetheisa ornatix (Linnaeus, 1758)	UTEORN
Virga clenchi L. Miller, 1970	Hesp091
